# Supplementary material
Source: publisher figshare collection journal article supplement (https://rs.figshare.com/ndownloader/files/42364659)
Supplement: Supplementary file 1 [file 42364659]

**Additional Tables for “A colonial-nesting seabird shows limited heart rate responses to natural variation in threats of polar bears”**

**Table S1.** Trail camera (Browning Inc. model BTC-5HDPX) settings selected to record polar bears (*Ursus maritimus*) movement behaviour on East Bay Island, Nunavut, Canada

| Settings | Selected Setting | | |
| --- | --- | --- | --- |
|  | Mounted | Ground-based | Ground-based (Focal Nests) |
| Capture Mode (Mode) | Video | Video | Video |
| Capture Delay | 1s | 5s | 5s |
| Multishot Modes (Multishot) | Off | Off | Off |
| Video Resolution (Video Quality) | High | Ultra | Ultra |
| Video Length | 30s | 2min | 2min |
| Smart IR Video (Smart IR) | Off | Off | Off |
| Adjustable IR Flash (Night Exp) | Long Range | Power Save | Power Save |
| Temperature Units (Temp) | C | C | C |
| Info Strip | On | On | On |
| SD Card Management | Off | Off | Off |
